# Supplementary material
Source: PubMed Central journal article supplement (PMC5752292)
Supplement: jciinsight-2-95692-s001.pdf [file jciinsight-2-95692-s001.pdf]

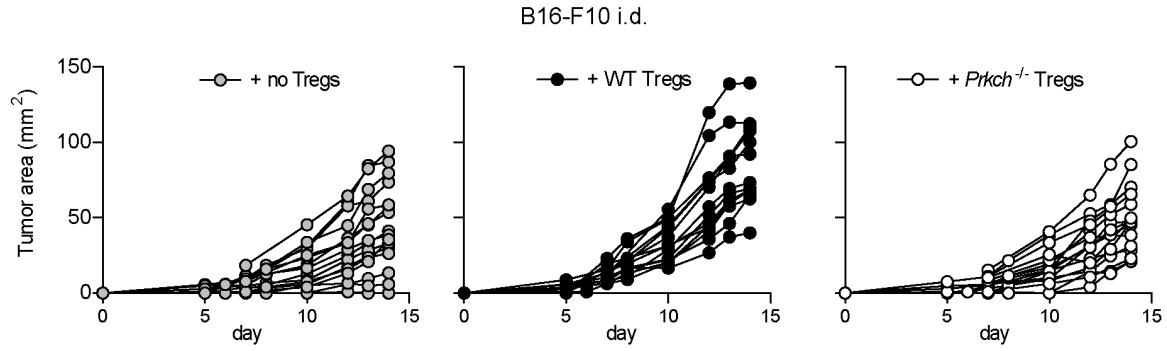

**Supplementary Figure 1: Impact of *Prkch*<sup>-/-</sup> Tregs on tumor growth.** *Rag1*<sup>-/-</sup> mice received CD25-depleted C57Bl/6 spleen cells as a source of Teff cells either alone (+ no Tregs, grey) or together with CD4<sup>+</sup>GFP<sup>+</sup> Tregs from WT (black) or *Prkch*<sup>-/-</sup> FIG mice (white). B16-F10 melanoma cells were inoculated 1 day later (0.5 x 10<sup>6</sup> i.d.). Tumors sizes were measured 3 times/week, and tumor areas (mm<sup>2</sup>) are shown. Each curve represents a single mouse, and cumulative data of 4 experiments are shown. no Tregs, n=16; + WT Tregs, n=14; + *Prkch*<sup>-/-</sup> Tregs, n=16.

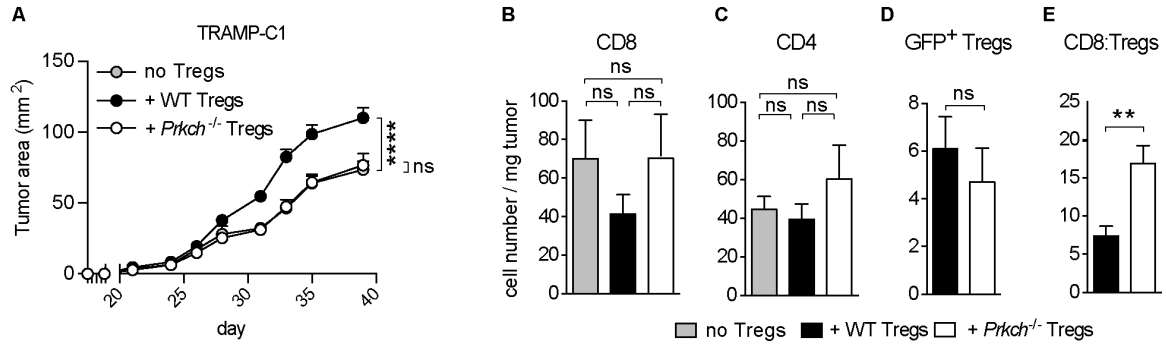

**Supplementary Figure 2: Impact of *Prkch*<sup>-/-</sup> Tregs on TRAMP-C1 tumor growth and intratumoral T cell infiltrates.** *Rag1*<sup>-/-</sup> mice received an adoptive transfer of spleen cells with or without Tregs as in Fig. S1, and TRAMP-C1 prostate adenocarcinoma cells ( $5 \times 10^6$ ) were inoculated s.c. 1 day later. **(A)** Tumors sizes were measured as in Fig. S1, and cumulative data of 4 experiments are shown as mean  $\pm$  sem. no Tregs, n=12; + WT Tregs, n=14; + *Prkch*<sup>-/-</sup> Tregs, n=12. Statistical significance was determined against the no Tregs group. **(B-E)** Numbers of tumor-infiltrating CD8<sup>+</sup> Teff cells **(B)**, CD4<sup>+</sup> Teff cells **(C)** and GFP<sup>+</sup> Tregs **(D)** per mg of tumor and CD8:Treg ratios **(E)** were analyzed on day 40. Cumulative data of 3 experiments are shown as mean  $\pm$  sem. no Tregs, n=11; + wt Tregs, n=10; + *Prkch*<sup>-/-</sup> Tregs n=9. Statistical significance of differences between groups was determined by repeated measures two-way ANOVA **(A)** or one-way ANOVA **(B-E)** followed by Tukey's multiple comparisons test. ns  $P > 0.05$ , \*\*,  $P \leq 0.01$ , \*\*\*\*,  $P \leq 0.0001$ .

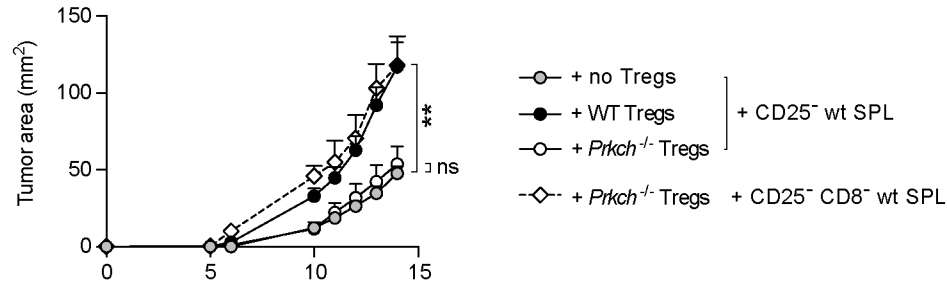

**Supplementary Figure 3: Reduced tumor growth in presence of *Prkch*<sup>-/-</sup> Tregs depends on CD8<sup>+</sup> T cells.** *Rag1*<sup>-/-</sup> mice received an adoptive transfer of spleen cells with or without Tregs as in Fig. S1. In one group of mice receiving *Prkch*<sup>-/-</sup> Tregs from FIG mice, the transferred spleen cells were also depleted of CD8<sup>+</sup> T cells (broken line). B16-F10 melanoma cells were inoculated i.d. 1 day later. Tumor sizes were measured to calculate tumor area (mm<sup>2</sup>), and are displayed as mean  $\pm$  sem. CD25<sup>-</sup> spleen cells w/o Tregs, n=6; CD25<sup>-</sup> spleen cells + WT Tregs, n=6; CD25<sup>-</sup> spleen cells + *Prkch*<sup>-/-</sup> Tregs, n=6; CD25<sup>-</sup>CD8<sup>-</sup> spleen + *Prkch*<sup>-/-</sup> Tregs, n=4. Statistical significance between groups was determined as in Fig. S2. ns,  $P > 0.05$ ; \*\*,  $P \leq 0.01$ . Statistical significance was determined against the no Tregs group.

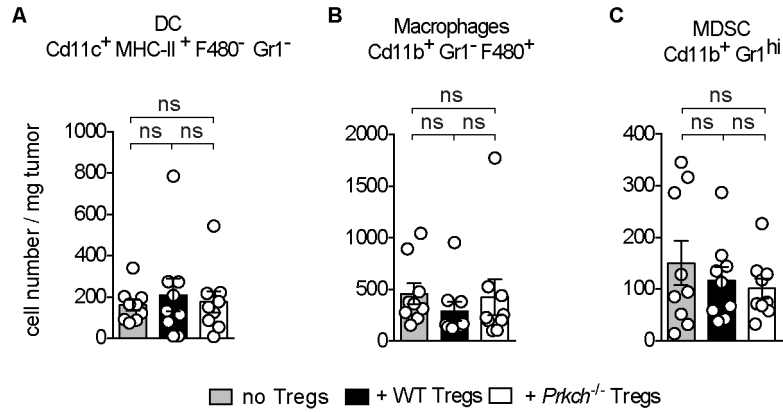

**Supplementary Figure 4: The presence of *Prkch*<sup>-/-</sup> Tregs does not affect tumor infiltration by myeloid cells.** *Rag1*<sup>-/-</sup> mice received an adoptive transfer of spleen cells with or without Tregs as in Fig. S1, and B16-F10 melanoma cells were inoculated 1 day later. Numbers of tumor-infiltrating DCs (**A**), macrophages (**B**), and myeloid derived suppressor cells (MDSCs; **C**) on day 14 are shown. n=9 mice/group. ns, *P* > 0.05. Statistical significance of differences between groups was determined by a 1-way ANOVA and Tukey's multiple comparisons test.

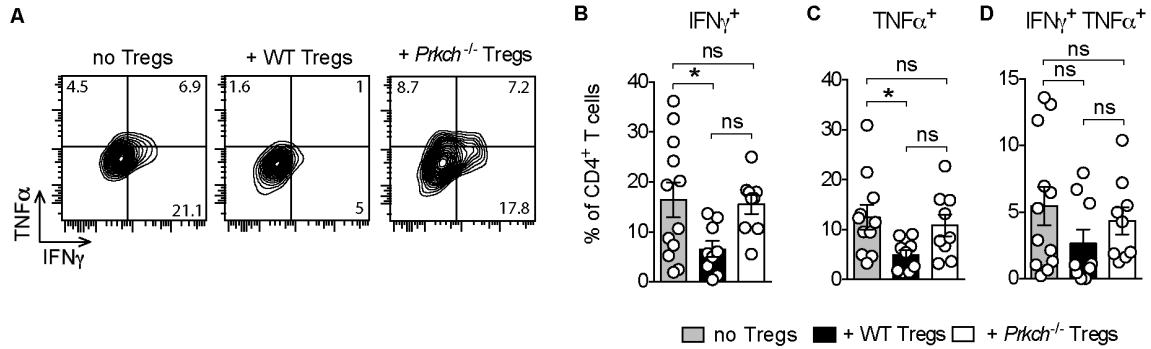

**Supplementary Figure 5: The presence of *Prkch* $^{-/-}$  Tregs favors intratumoral CD4 $^{+}$  TILs functionality.** *Rag1* $^{-/-}$  mice received an adoptive transfer of spleen cells +/- Tregs as in Fig. S1, and B16-F10 melanoma cells were inoculated i.d. 1 day later. TILs were harvested on day 14 and briefly stimulated ex vivo with PMA plus ionomycin to assess IFN $\gamma$  and TNF $\alpha$  expression in CD4 $^{+}$  T cells by intracellular staining. Representative dot plots (**A**), and percentage of IFN $\gamma$  $^{+}$  (**B**), TNF $\alpha$  $^{+}$  (**C**) or IFN $\gamma$  $^{+}$  TNF $\alpha$  $^{+}$  (**D**) cells among CD8 $^{+}$  TILs are shown. Cumulative data of 3 experiments (no Tregs, n=12; + WT Tregs, n=9; + *Prkch* $^{-/-}$  Tregs, n=9). ns,  $P > 0.05$ ; \*,  $P \leq 0.05$ . Statistical significance of differences between groups was determined by 1-way ANOVA and Tukey's multiple comparisons test.

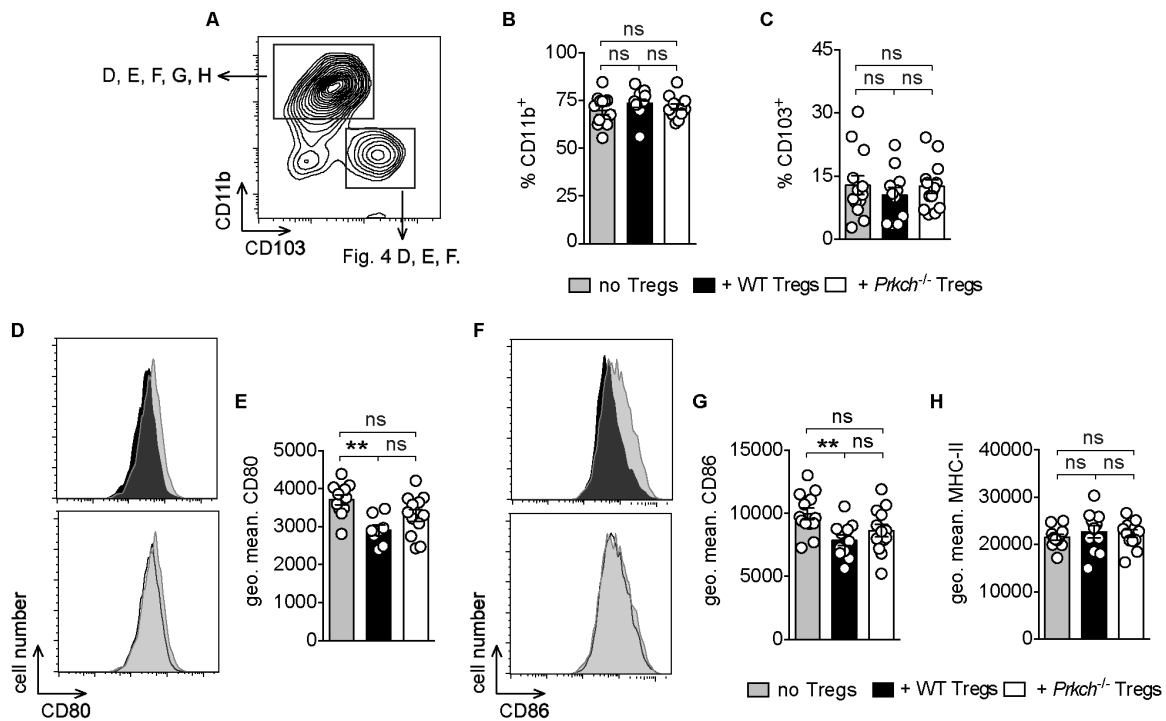

**Supplementary Figure 6: Impact of *Prkch*<sup>-/-</sup> Tregs on intratumoral DC subsets and CD11b<sup>+</sup> DC activation.** *Rag1*<sup>-/-</sup> recipient mice received an adoptive transfer of spleen cells +/- Tregs as in Fig. S1. OVA-expressing B16-F10 melanoma cells (B16-OVA) were inoculated i.d. 1 day later. CTV-labeled naive OT-I CD8<sup>+</sup> CD45.1<sup>+</sup> T cells were transferred i.v. into tumor-bearing mice on day 10. Data are derived from the same experiments as in Fig. 4. (**A-C**) DC subsets boxed in (**A**) were analyzed to determine the % of CD11b<sup>+</sup> (**B**) and CD103<sup>+</sup> (**C**) subsets on day 13. (**D-H**) The expression of CD80 (**D**, **E**), CD86 (**F**, **G**) and MHC-II (**H**) by CD11b<sup>+</sup> DCs was analyzed. Representative FACS plots (**D**, **F**) and cumulative data of 3 experiments (**E**, **G**, **H**) are shown (no Tregs, n=10; + WT Tregs, n=8; + *Prkch*<sup>-/-</sup> Tregs, n=10). ns, *P* > 0.05; \*\*, *P* ≤ 0.01. Statistical significance of differences between groups was determined as in Fig. S5.
